# Supplementary material for: History of modern nutrition science—implications for current research, dietary guidelines, and food policy
Source: PubMed Central journal article supplement — BMJ. 2018 Jun 13;361:k2392. doi: 10.1136/bmj.k2392 (PMC5998735; doi:10.1136/bmj.k2392), 2018-06-13

While food and nutrition have been studied for centuries, modern nutritional science is surprisingly young. This timeline shows how developments in the early 20th Century have persistently shaped our understanding of the field, at times limiting our knowledge of the complex links between dietary patterns and health.

## Era of vitamin discovery

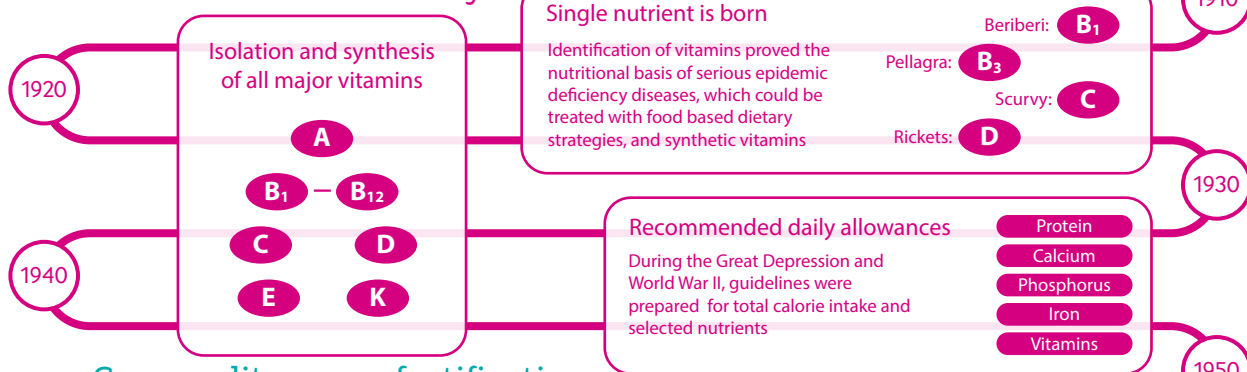

## Commodity crops, fortification

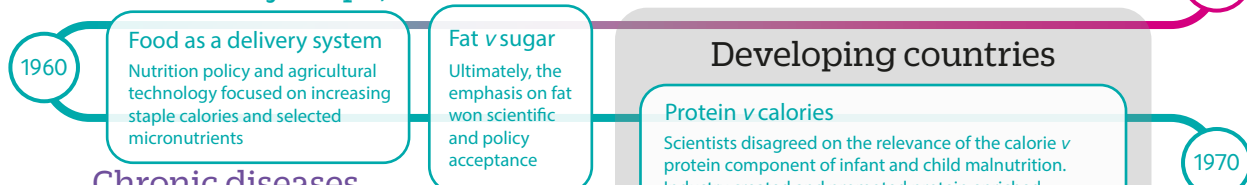

## Chronic diseases

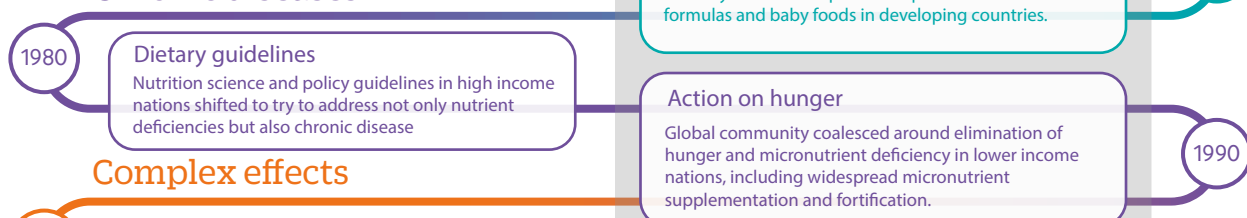

## Complex effects

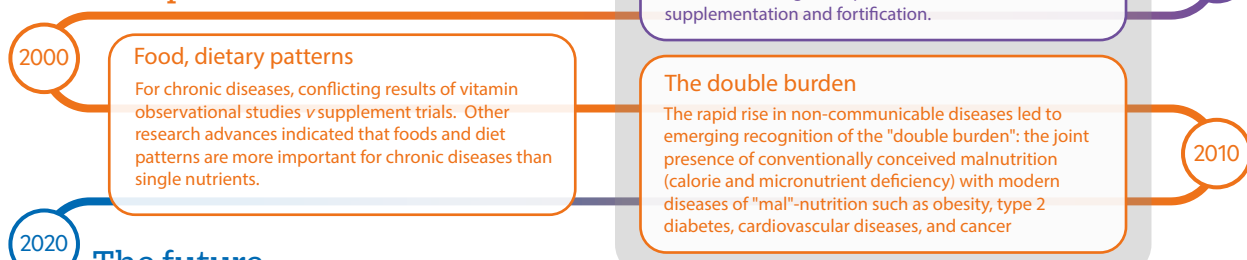

## The future

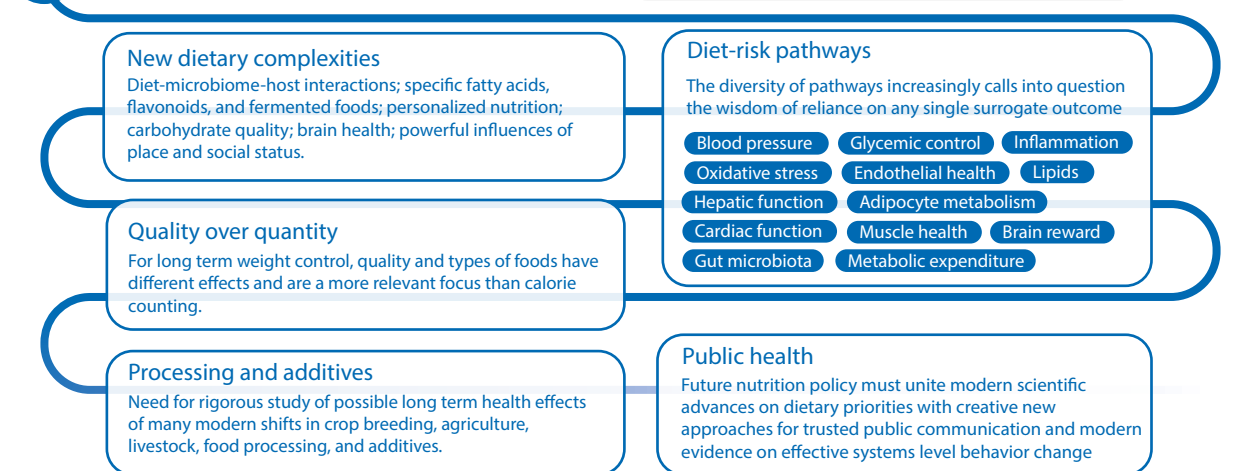

Supplement: Mozd045248.www.pdf [file Mozd045248.www.pdf]
